## Regulation of phosphate transport and AMPK signal pathway by lower dietary phosphorus of broilers

Zhiqiang Miao<sup>1</sup>, Yan Feng<sup>1</sup>, Junzhen Zhang<sup>1</sup>, Wenxia Tian<sup>1</sup>, Jianhui Li<sup>1</sup> and Yu Yang<sup>1</sup>

<sup>1</sup>College of Animal Science and Veterinary Medicine, Shanxi Agricultural University, Taigu, Shanxi 030801, China

**Correspondence to:** Yu Yang, **email:** sxauywd@126.com  
Jianhui Li, **email:** 504387687@qq.com

**Keywords:** AMPK signal pathway; broilers; lower dietary phosphorus; phosphate transport regulation

**Received:** September 30, 2017

**Accepted:** October 29, 2017

**Published:** November 22, 2017

**Copyright:** Miao et al. This is an open-access article distributed under the terms of the Creative Commons Attribution License 3.0 (CC BY 3.0), which permits unrestricted use, distribution, and reproduction in any medium, provided the original author and source are credited.

### ABSTRACT

**Lower available P (aP) was used as a base value in nutritional strategies for mitigating P pollution by animal excreta. We hypothesized that the mechanism regulating phosphate transport under low dietary P might be related with the AMPK signal pathway. A total of 144 one-day-old Arbor Acres Plus broilers were randomly allocated to control (HP) or trial (LP) diets, containing 0.45 and 0.23% aP, respectively. Growth performance, blood, intestinal, and renal samples were tested in 21-day-old broilers. Results shown that LP decreased body weight gain and feed intake. Higher serum Ca and fructose, but lower serum P and insulin were detected in LP-fed broilers. NaPi-IIb mRNA expression in intestine and NaPi-IIa mRNA expression in kidney were higher in the LP group. AMP: ATP, p-AMPK: total AMPK, and p-ACC: total ACC ratios in the duodenal mucosa were decreased in the LP group, whereas the p-mTOR: total mTOR ratio increased. These findings suggested that the increase in phosphate transport owing to LP diet might be regulated either directly by higher mTOR activity or indirectly by the suppressive AMPK signal, with corresponding changes in blood insulin and fructose content. A novel viewpoint on the regulatory mechanism underlying phosphate transport under low dietary P conditions was revealed, which might provide theoretical guidelines for reducing P pollution by means of nutritional regulation.**

### INTRODUCTION

Phosphorus (P) is an essential nutrient for skeletal development in rapidly growing bird. However, there is increasing concern over excess P pollution by animal excreta in animal production systems. In addition, inorganic phosphates are a nonrenewable natural resources and its conservation is a global concern [1]. Consequently, the efficiency of P utilization has been focused on in contemporary research.

To address this issue, poultry nutritionists have developed several nutritional strategies, including the estimation of precise P requirements [2], dietary supplementation with feed additives, such as microbial phytase [3], vitamin D<sub>3</sub> metabolites [4], and organic acids [5], as well as feed ingredients with low phytin-P [6, 7]. Most of the effective nutritional strategies set

at lowering dietary available P (aP). Providing lower amounts of P than the estimated requirement was an effective method of reducing the excretion of P, and it was independent of phytase supplementation [8]. Another study showed that higher adaptive capacity was found in modern broilers subjected to early dietary P restrictions [9].

Dietary P restriction up-regulates the transport of Na<sup>+</sup>-dependent phosphate. Reducing dietary aP concentration by 43% stimulates Na<sup>+</sup>-dependent phosphate uptake and expression of the type IIb sodium-phosphate cotransporter (NaPi-IIb) protein in the brush border membrane of the small intestine [10]. NaPi-IIb is a critical transport protein for phosphate uptake in the small intestine, particularly in the duodenum [11]. However, reports on the mechanism underlying the regulation of intestinal absorption by low P are scarce.

AMP-activated protein kinase (AMPK), which is a sensor of peripheral energy balance, can be phosphorylated and activated by metabolic changes and an increase in the AMP:ATP ratio [12]. Once activated, AMPK switches off ATP-consuming biosynthetic pathways and switches on ATP-generating metabolic pathways. Feeding behavior is regulated by AMPK phosphorylation in the hypothalamus [13]. In addition, NaPi-IIb gene expression in the intestine is linked to the metabolic state of cells through AMPK activity, and AMPK has an inhibitory effect on NaPi-IIb in rats [14]. However, no data are available on the effect of dietary P on AMPK during the process of phosphate absorption in broilers.

In the present study, our aim was to reveal the mechanism regulating phosphate transport affected by low dietary P, from a novel viewpoint. We examined the effects of reduced dietary aP on blood parameters, phosphate transport mRNA expression in intestine and kidney, and the AMPK signal pathway protein expression in growing broilers. A certain relationship might be existed between phosphorus absorption and AMPK signal pathway by low dietary P.

## RESULTS AND DISCUSSION

### Effect of diets on growth performance of broilers

BWG and FI of broilers were significantly lower in the 0.23% aP diet group than in the control group (Table 1,  $P < 0.001$ ). However, FCR was not different between the low and the control P groups, consistent with the findings of previous studies [15, 16]. The negative effect of feeding the diet with 0.23% aP on growth performance might have been due to a wider Ca:aP ratio (4.3:1), and the amount of aP in the diet [15]. A wider Ca:aP ratio could disturb P metabolism, thereby resulting in reduced growth, and this effect is more severe when dietary P level is too low [17]. In an earlier study, dietary P deficiency could suppress the Ca-specific appetite and growth of broilers [18].

Moreover, higher adaptive capacity was found in the modern broilers when they were subjected to early dietary P restriction (i.e., 0.30% aP as compared with 0.45% aP) [9], the body weight was lower in the initial phase, but could catch up with the control birds during the grower period, and had a higher apparent absorption of total P.

### Effect of diets on serum parameters of broilers

A study found that Ca:P ratios were related to the prevalence of central obesity [19]. We detected the relative index, and serum insulin was decreased in the group fed with lower P (Table 2,  $P < 0.05$ ). Higher serum Ca and lower serum P were caused by low dietary P ( $P < 0.001$ ). Insulin might be a regulator in phosphate absorption or re-absorption by ruminants [20] and a central regulatory factor in the control of nutrient partitioning during growth and development. A previous study on the relationship between

growth and plasma insulin has shown that muscle protein synthesis was stimulated by insulin in growing animals [21]. Therefore, the lower body weight of broilers fed low dietary P might be related with the lower secretion of insulin.

Further we found that fructose in serum was higher in the group fed with low P, whereas the glucose concentration remained unchanged ( $P < 0.05$ ). Low dietary P was reported to weaken insulin signaling through higher fructose concentration in human blood [22]. Excess consumption of fructose in humans increased body weight and induced adiposity, and hyperlipidemia in humans and rodents [23, 24]. Therefore, low-P feed might interfere with fat metabolism.

### Effect of diets on P transporter mRNA expression in duodenum and kidney

In the present study, NaPi-IIb mRNA expression in intestine and NaPi-IIa mRNA expression in kidney were both enhanced by low dietary P as compared with adequate P (Table 3). During P balance, P absorption and re-absorption take place in the intestine and kidney mainly through NaPi-IIb and NaPi-IIa. Up-regulation of small intestinal absorption of phosphate due to low dietary P was described in many species; the adaptive response to low-P diet leads to an increased kinetic parameters ( $V_{max}$ ) of Na-Pi cotransporter [25].

Dietary P deprivation could increase the serum  $1,25-(OH)_2D_3$  levels and enhance the 25-hydroxyvitamin  $D_3$   $1\alpha$ -hydroxylase ( $1\alpha$ -hydroxylase) protein and mRNA expression in kidneys [15, 26]. The synthesis of active vitamin  $D_3$  can be promoted by parathyroid hormone (PTH) through stimulation of the gene promoter  $25-OH-D_3-1\alpha$ -hydroxylase [27]. PTH promotes Ca re-absorption and suppresses phosphate reabsorption in the proximal tubules [28]. In addition, dietary P regulation of  $1,25(OH)_2D$  production was proved to be mediated by changes in circulating fibroblast growth factor 23 (FGF-23) [29]. FGF-23, a phosphatonin, regulates phosphate reabsorption in the kidney, and therefore plays an essential role in phosphate balance [30]. Moreover, FGF23 inhibits  $Na^+$ -dependent inorganic phosphate transport, intestinal  $Na^+$ -dependent P transport activity, and NaPi-IIb protein levels by a mechanism that is dependent on Vitamin D receptor [31]. FGF-23 could suppress the production of  $1,25(OH)_2D_3$ , and decrease the protein expression of NaPi-IIa [32]. Serum FGF-23 concentration decreased significantly during dietary P restriction [30]; therefore, the inhibiting effect on expression of NaPi-IIa and NaPi-IIb protein by FGF-23 was weakened.

These results suggest that, during the earlier growth stage with P-restricted diet, P absorption and re-absorption were both enhanced in order to maintain an optimal level of P in the body. Bar *et al.* (2003) concluded that modern broilers exhibit high adaptability to P deficiency [33]. However, the strength was not enough to maintain growth.

**Table 1: The influence of low aP levels on growth performance of broilers (n = 6)**

| aP <sup>1</sup> | BWG (g) <sup>2</sup> | FI (g) <sup>3</sup> | FCR <sup>4</sup>  |
|-----------------|----------------------|---------------------|-------------------|
| LP <sup>5</sup> | 560.15 <sup>A</sup>  | 623.47 <sup>A</sup> | 1.21 <sup>b</sup> |
| HP <sup>6</sup> | 846.53 <sup>B</sup>  | 947.36 <sup>B</sup> | 1.17 <sup>a</sup> |
| SEM             | 4.52                 | 5.76                | 0.006             |
| P-value         | < 0.001              | < 0.001             | 0.08              |

<sup>a-b</sup>Within a column, values not sharing a common superscript letter are significantly different at  $0.01 < P < 0.05$

<sup>A-B</sup>Within a column, values not sharing a common superscript letter are significantly different at  $P < 0.01$

<sup>1</sup>aP: available phosphorus

<sup>2</sup>BWG: body weight gain

<sup>3</sup>FI: feed intake

<sup>4</sup>FCR: feed conversion ratio

<sup>5</sup>LP: lower dietary phosphorus

<sup>6</sup>HP: higher dietary phosphorus.

### Effect of low dietary P on AMPK signal regulation

Previous studies have shown that high Ca and Vitamin D<sub>3</sub> intakes caused lesser adiposity and lipid accumulation, probably via an insulin and AMPK- independent pathway [34]. However, few studies have reported about the effect of dietary P on the AMPK pathway. In the present study, AMPK phosphorylation and ACC phosphorylation in the intestine showed that p-AMPK:total AMPK ratio and p-ACC:total ACC ratio were decreased, and p-mTOR:total mTOR ratio was increased in the intestine of broilers feeding on a low-P diet ( $P < 0.05$ , Table 4). The novel and important findings of the present study are that the low-P diet resulted in decreased AMP:ATP ratio in the duodenum of chickens, which was positively correlated with AMPK phosphorylation. NaPi-IIb gene expression is linked to the metabolic state of cells through AMPK activity, whereas NaPi-IIb in the small intestine might be inhibited by AMPK activation in rats [14]. Furthermore, mTOR, which is a kinase known to regulate many intestinal nutrient transporters, is inhibited by the activation of AMPK [35]. In addition, NaPi-IIb has been shown to be stimulated directly by mTOR [36]. Therefore, in the present study the higher NaPi-IIb mRNA expression induced by low dietary P might be stimulated directly by mTOR or indirectly by AMPK signals.

ACC is a downstream target protein of the AMPK signal pathway. Phosphorylated AMPK could inhibit the activity of ACC by enhancing ACC phosphorylation, which decreases the synthesis of fatty acid. In the present study, ACC phosphorylation was decreased and its activity was enhanced, accompanied by lower AMPK phosphorylation. It implies that the synthesis of fatty acids would be increased correspondingly, and this process is an ATP-consuming biosynthetic pathway. This might be the reason underlying the low P status, which is reported to contribute to the onset of obesity [37]. Conversely, HP diet was suggested to enhance energy expenditure through the utilization of free fatty acids, which were released via lipolysis of white adipose tissue, and decrease lipid accumulation [38, 39]. This was consistent

with the higher fructose concentration in blood induced by low-P diet, which might induce adiposity [24].

In conclusion, low dietary P increased the NaPi-IIb mRNA expression in the intestines and NaPi-IIa mRNA expression in the kidneys, in addition to lower blood insulin and higher fructose levels. This process might be regulated directly by mTOR or indirectly through AMPK signal. The present study revealed the regulatory mechanism of phosphate transport affected by low dietary P from a novel viewpoint. This might provide theoretical guidelines for reducing P emission by means of nutritional regulation.

## MATERIALS AND METHODS

### Animals and diets

The present study was performed in accordance with the Guidelines for Experimental Animal Welfare of the Ministry of Science and Technology of China (Beijing, P. R. China), after approval. A total of 144 one-day-old Arbor Acres Plus broilers were purchased from a local hatchery and randomly allocated to 12 pens, with 12 chickens in each pen.

The chickens were fed with diets containing either 0.45% (high) aP as a control, or 0.23% (low) aP as a trial group. Each of the two diets was fed to six replicate pens. The other nutrients were based on the recommendations of the National Research Council in 1994. The dietary composition and nutrient content are shown in Table 5.

The chickens were reared under controlled environments. The temperature was initially maintained at 34°C when the broilers were 1-3 days old, followed by a gradual decrease to room temperature (24°C). The light regimen was 23:1 (light: dark). All the birds were provided mashed feed and tap water *ad libitum*.

### Sample collection

At the age of 21 days, the body weight of each broiler was measured 4 h after feed withdrawal and the

**Table 2: The effect of low aP levels on blood parameters (n = 6)**

| aP <sup>1</sup> | Ca (mg mL <sup>-1</sup> ) | P (mg mL <sup>-1</sup> ) | Insulin (IU L <sup>-1</sup> ) | Fructose (mg mL <sup>-1</sup> ) | Glucose (nmol L <sup>-1</sup> ) |
|-----------------|---------------------------|--------------------------|-------------------------------|---------------------------------|---------------------------------|
| LP <sup>2</sup> | 2.67 <sup>B</sup>         | 1.155 <sup>A</sup>       | 10.86 <sup>a</sup>            | 7.26 <sup>b</sup>               | 13.81                           |
| HP <sup>3</sup> | 1.97 <sup>A</sup>         | 1.808 <sup>B</sup>       | 20.32 <sup>b</sup>            | 6.36 <sup>a</sup>               | 13.86                           |
| SEM             | 0.03                      | 0.023                    | 2.33                          | 0.128                           | 0.083                           |
| <i>p</i> -value | < 0.001                   | < 0.001                  | 0.032                         | 0.011                           | 0.734                           |

<sup>a-b</sup>Within a column, values not sharing a common superscript letter are significantly different at 0.01 < *P* < 0.05

<sup>A-B</sup>Within a column, values not sharing a common superscript letter are significantly different at *P* < 0.01.

<sup>1</sup>aP: available phosphorus

<sup>2</sup>LP: lower dietary phosphorus

<sup>3</sup>HP: higher dietary phosphorus.

**Table 3: The effect of low aP levels on NaPi-IIb and NaPi-IIa mRNA expression (n = 6)**

| aP <sup>1</sup> | NaPi-IIb mRNA expression in Duodenum | NaPi-IIa mRNA expression in Kidney |
|-----------------|--------------------------------------|------------------------------------|
| LP <sup>2</sup> | 19.65 <sup>a</sup>                   | 3.45 <sup>B</sup>                  |
| HP <sup>3</sup> | 12.30 <sup>b</sup>                   | 2.18 <sup>A</sup>                  |
| SEM             | 0.502                                | 0.23                               |
| <i>P</i> -value | 0.034                                | 0.003                              |

<sup>a-b</sup>Within a column, values not sharing a common superscript letter are significantly different at 0.01 < *P* < 0.05

<sup>A-B</sup>Within a column, values not sharing a common superscript letter are significantly different at *P* < 0.01

<sup>1</sup>aP: available phosphorus

<sup>2</sup>LP: lower dietary phosphorus

<sup>3</sup>HP: higher dietary phosphorus.

**Table 4: The influence of low aP levels on AMPK signal pathway (n = 6)**

| aP <sup>1</sup> | AMP:ATP ratio      | p-AMPK:T-AMPK      | p-ACC:T-ACC        | p-mTOR:T-mTOR      |
|-----------------|--------------------|--------------------|--------------------|--------------------|
| LP <sup>2</sup> | 59.85 <sup>A</sup> | 0.643 <sup>a</sup> | 0.587 <sup>a</sup> | 0.482 <sup>b</sup> |
| HP <sup>3</sup> | 76.85 <sup>B</sup> | 0.906 <sup>b</sup> | 0.729 <sup>b</sup> | 0.429 <sup>a</sup> |
| SEM             | 5.51               | 0.06               | 0.036              | 0.01               |
| <i>P</i> -value | < 0.001            | 0.03               | 0.017              | 0.024              |

<sup>a-b</sup>Within a column, values not sharing a common superscript letter are significantly different at 0.01 < *P* < 0.05

<sup>A-B</sup>Within a column, values not sharing a common superscript letter are significantly different at *P* < 0.01.

<sup>1</sup>aP: available phosphorus

<sup>2</sup>LP: lower dietary phosphorus

<sup>3</sup>HP: higher dietary phosphorus.

feed remaining in the trough was weighed. Body weight gain (BWG), feed intake (FI), and feed conversion ratio (FCR) from days 1-21 was calculated.

After the birds were weighed, blood sample was drawn from a wing vein of one bird from each pen, weighing closest to the mean body weight for each treatment. Serum was obtained after centrifugation at 3,000 × *g* for 10 min and was stored at -20°C for further analysis. Immediately after the blood sample was obtained, the chickens were killed by cervical dislocation. 10-cm segments of duodenal tissues of these 21-day-old broilers

were cut longitudinally, and the contents were flushed with ice-cold PBS. Mucosal samples were rapidly collected by scraping with a sterile glass microscope slide, immediately frozen in liquid nitrogen, and stored at -80°C until analysis.

### Blood parameters

The concentration of glucose (No. F006), fructose (No. A085), Ca (No. C004-1) and P (No. C006) in serum were measured spectrophotometrically using commercial diagnostic kits (Jiancheng, Nanjing, China). Serum insulin

**Table 5: Composition of diets and nutrient levels in broilers**

|                                   | 0-21 days       |                   |
|-----------------------------------|-----------------|-------------------|
|                                   | Trial diet (LP) | Control diet (HP) |
| <b>Ingredients (%)</b>            |                 |                   |
| Corn                              | 41.44           | 41.44             |
| Soybean meal                      | 44.72           | 44.72             |
| Soybean oil                       | 9.36            | 9.36              |
| Limestone                         | 2.2             | 1.32              |
| Dicalcium phosphate               | 0.26            | 1.64              |
| Maifanite                         | 1               | 0.5               |
| DL-methionine                     | 0.16            | 0.16              |
| Salt                              | 0.30            | 0.30              |
| Trace mineral premix <sup>1</sup> | 0.20            | 0.20              |
| Vitamin premix <sup>2</sup>       | 0.03            | 0.03              |
| 50% Choline chloride              | 0.30            | 0.30              |
| Antioxidant                       | 0.03            | 0.03              |
| Total                             | 100             | 100               |
| <b>Nutrient composition</b>       |                 |                   |
| ME (MJ kg <sup>-1</sup> )         | 13.37           | 13.37             |
| CP <sup>3</sup> (%)               | 23.00           | 23.00             |
| Ca (%)                            | 1.00            | 1.00              |
| Available P <sup>4</sup> (%)      | 0.23            | 0.45              |
| Total P <sup>4</sup> (%)          | 0.43            | 0.65              |
| Lysine (%)                        | 1.20            | 1.20              |
| Methionine (%)                    | 0.52            | 0.52              |
| Tryptophan (%)                    | 0.33            | 0.33              |
| Threonine (%)                     | 0.97            | 0.97              |

<sup>1</sup>Nutrients per kilogram of diet: Cu (from CuSO<sub>4</sub>·5H<sub>2</sub>O), 16 mg; Fe (from FeSO<sub>4</sub>·7H<sub>2</sub>O), 80 mg; Zn (from ZnSO<sub>4</sub>·7H<sub>2</sub>O), 110 mg; Mn (from MnSO<sub>4</sub>·H<sub>2</sub>O), 120 mg; I (from Ca(IO<sub>3</sub>)<sub>2</sub>·H<sub>2</sub>O), 1.5 mg; Co (from CoCl<sub>2</sub>·6H<sub>2</sub>O), 0.5 mg; Se (from organic selenium), 0.3 mg.

<sup>2</sup>Nutrients per kilogram of diet: vitamin A, 12,500 IU; vitamin D<sub>3</sub>, 3,000 IU; vitamin E, 25 mg; vitamin K<sub>3</sub>, 2.5 mg; thiamin, 2.5 mg; riboflavin, 8 mg; vitamin B<sub>12</sub>, 0.025 mg; folic acid, 1.25 mg; niacin, 37.5 mg; pantothenic acid, 12.5 mg; biotin, 0.125 mg.

<sup>3</sup>Crude protein (CP) content of corn is 8.7%; CP content of soybean meal is 43%.

<sup>4</sup>The analyzed levels of available P were 0.22 %, 0.46 %. The analyzed levels of total P were 0.45%, 0.67%.

level was measured by radioimmunoassay as Liu *et al.* (2012) described [40].

The ATP and AMP content was analyzed according to the method of Hou *et al.* (2011) using high-performance liquid chromatography [42].

#### Determination of mucosal ATP and AMP content

Frozen mucosal samples (100-200 mg) were homogenized with 2 mL pre-cooled 1.5 mmol/L sodium fluoride-perchloric acid in an ice-bath [41]. The homogenates were centrifuged at 3,000 ×g for 10 min at 4°C. One milliliter of the supernatant was neutralized with 0.4 mL of 2 M potassium carbonate on ice, and the solution was centrifuged at 3,000 ×g for 5 min at 4°C.

#### Total RNA extraction, reverse transcription, and real-time PCR

Total RNA was extracted from the duodenal mucosa of the 21-day-old broilers using the SV Total RNA Isolation System Kit (Z3100; Promega, Madison, WI, USA), according to the manufacturer's instructions. The RNA was re-suspended in diethyl pyrocarbonate-treated

**Table 6: Oligonucleotide PCR primers**

| Gene     | GenBank accession | Orientation | Primer sequence (5'→3') | Predicted size (bp) |
|----------|-------------------|-------------|-------------------------|---------------------|
| NaPi-IIb | NM_204474.1       | Forward     | CTTTTACTTGGCTGGCTGGAT   | 148                 |
|          |                   | Reverse     | AGGGTGAGGGGATAAGAACG    |                     |
| NaPi-IIa | AF297188.1        | Forward     | CCGCACCTCCCCAGACT       | 100                 |
|          |                   | Reverse     | GTTGTGGAGGATCCCAATGC    |                     |
| β-Actin  | NM_205518.1       | Forward     | AACACCCACACCCCTGTGAT    | 100                 |
|          |                   | Reverse     | TGAGTCAAGCGCCAAAAGAA    |                     |

water. The concentration and quality of the RNA were determined by measuring the absorbance at 260 nm and agarose gel electrophoresis, respectively.

After extraction, 1.0 µg total RNA was used as the template for synthesizing single-stranded cDNA with avian myeloblastosis virus reverse transcriptase (Promega, Madison, WI, USA) using a 15-mer oligo (dT) primer in the presence of recombinant RNasin ribonuclease inhibitor (A3500; Promega, Madison, WI, USA).

Real-time PCR of NaPi-IIb, NaPi-IIa were performed with β-actin as the internal control. The primers and amplicon sizes are presented in Table 6. Real-time PCR was conducted in an ABI 7500 Fluorescent Quantitative PCR system (Applied Biosystems, Bedford, MA) using the RealSuper mixture with Rox (CW0767; CWbio Company, Sandringham, UK). The PCR conditions were as follows: 95°C for 4 min, followed by 40 cycles of 95°C for 15 s and 60°C for 60 s, and 60–95°C for melting curve analysis. Each gene was amplified in triplicate. Standard curves were analyzed simultaneously to determine the efficiency of amplification. The results were expressed as the ratio of the target gene mRNA to β-actin mRNA, and the differences in gene expression were determined using the cycle threshold method [15].

### Western blot analysis

The duodenal brush-border membrane vesicles were homogenized and centrifuged at 10,000 ×g for 5 min at 4°C. The resulting supernatants were stored at –80°C until further use. Protein concentration was determined by the Bradford assay. The samples of brush-border membrane vesicles were placed in Laemmli buffer (Sigma-Aldrich, St. Louis, MO, USA) and boiled for 5 min to induce protein denaturation. Thereafter, 50 mg of brush-border membrane vesicle proteins were loaded onto each lane and electrophoresed on a 4% polyacrylamide gel. The proteins were subsequently transferred onto a polyvinylidene difluoride membrane for 2 h, followed by probing the polyvinylidene difluoride membrane for the presence of target proteins by incubation with the following primary antibodies (AMPK-α antibody, P-AMPKα (Thr172) antibody, ACC (Acetyl-CoA carboxylase) antibody, P- ACC antibody,

mTOR antibody, P-mTOR(Ser2448 antibody), diluted to 1:1000, for at least 1 h. The antibodies were purchased from Cell Signaling Technology (Inc., Beverly, MA, USA). The membrane was washed in Tris-buffered saline Tween-20 and incubated with a secondary antibody conjugated with horseradish peroxidase (1:5000; Bio-Rad, Hercules, CA, USA). The immunoblots were visualized on an X-ray film through chemiluminescence (Pierce Protein Research Products, Rockford, IL, USA), and optical density-calibrated images were analyzed using AlphaEase stand-alone software (Alpha Innotech, Santa Clara, CA, USA) [43].

### Statistical analyses

The results were analyzed by one-way analysis of variance (ANOVA) using SPSS ver. 17.0 (IBM-SPSS, Inc., Chicago, IL, USA). The replicate means were used as experimental units in this analysis. When a treatment was significant ( $P < 0.05$ ), the differences between the means were assessed using Tukey's honest significant difference multiple range analysis. Prior to analysis, the homogeneity of variance was examined, and the normality of data was verified. Data are presented as mean values.

### Author contributions

Yu Yang conceived the idea and designed the experiments, Jianhui Li Performed the experiments, Junzhen Zhang and Yan Feng analyzed the data, Wenxia Tian contributed reagents/materials/analytical tools, and Zhiqiang Miao wrote the paper.

### ACKNOWLEDGMENTS AND FUNDING

This study was financially supported by the National Youth Science Fund Project (31301992), Science and Technology Support Plan projects (2012BAD39B0402), Shanxi Agricultural University Youth Innovation Talent Support Fund Project (BJRC201603), Shanxi Youth Science Fund Project (201601D202065).

We would also like to thank Editage [www.editage.cn] for English language editing.

## CONFLICTS OF INTEREST

No conflicts of interest.

## REFERENCES

1. Abelson PH. A potential phosphate crisis. *Science*. 1999; 283:2015.
2. Dhandu AS, Angel R. Broiler nonphytin phosphorus requirement in the finisher and withdrawal phases of a commercial four-phase feeding system. *Poultry Science*. 2003; 82:1257–65.
3. Kim JH, Jung H, Pitargue FM, Han GP, Choi HS, Kil DY. Effect of dietary calcium concentrations in low non-phytate phosphorus diets containing phytase on growth performance, bone mineralization, litter quality, and footpad dermatitis incidence in growing broiler chickens. *Asian-Australasian Journal of Animal Sciences*. 2017; 30:979–983.
4. Han JC, Yang XD, Zhang T, Li H, Li WL, Zhang ZY, Yao JH. Effects of 1 $\alpha$ -hydroxycholecalciferol on growth performance, parameters of tibia and plasma, meat quality, and type IIb sodium phosphate cotransporter gene expression of one- to twenty-one-day-old broilers. *Poultry Science*. 2009; 88:323–329.
5. Islam KM. Use of citric acid in broiler diets. *Worlds Poultry Science Journal*. 2012; 68:104–118.
6. Jang DA, Fadel JG, Klasing KC, Mireles AJ Jr, Ernst RA, Young KA, Cook A, Raboy V. Evaluation of low-phytate corn and barley on broiler chick performance. *Poultry Science*. 2003; 82:1914–1924.
7. Linares LB, Broomhead JN, Guaiume EA, Ledoux DR, Veum TL, Raboy V. Effects of low phytate barley (*Hordeum vulgare* L.) on zinc utilization in young broiler chicks. *Poultry Science*. 2007; 86:299–308.
8. Applegate TL, Joern BC, Nussbaum-Wagler DL, Angel R. Water-soluble phosphorus in fresh broiler litter is dependent upon phosphorus concentration fed but not on fungal phytase supplementation. *Poultry science*. 2003; 82:1024–1029.
9. Yan F, Angel R, Ashwell C, Mitchell A, Christman M. Evaluation of the broiler's ability to adapt to an early moderate deficiency of phosphorus and calcium. *Poultry Science*. 2005; 84:1232–41.
10. Saddoris KL, Fleet JC, Radcliffe JS. Sodium-dependent phosphate uptake in the jejunum is post-transcriptionally regulated in pigs fed a low-phosphorus diet and is independent of dietary calcium concentration. *Journal of Nutrition*. 2010; 140:731–736.
11. Marks J, Debnam ES, Unwin RJ. Phosphate homeostasis and the renal-gastrointestinal axis. *American Journal of Physiology—Renal Physiology*. 2010; 299:F285-F296.
12. Tulipano G, Faggi L, Sibilia V, Giustina A. Points of integration between the intracellular energy sensor AMP-activated protein kinase (AMPK) activity and the somatotroph axis function. *Endocrine*. 2012; 42:292–298.
13. Kim E, Miller I, Aja S, Landree LE, Pinn M, McFadden J, Kuhajda FP, Moran TH, Ronnett GV. C75, a fatty acid synthase inhibitor, reduces food intake via hypothalamic AMP-activated protein kinase. *Journal of Biological Chemistry*. 2004; 279:19970–19976.
14. Kirchner S, Muduli A, Casirola D, Prum K, Douard V, Ferraris RP. Luminal fructose inhibits rat intestinal sodium-phosphate cotransporter gene expression and phosphate uptake. *American Journal of Clinical Nutrition*. 2008; 87:1028–1038.
15. Li JH, Yuan JM, Guo YM, Sun QJ, Hu XF. The influence of dietary calcium and phosphorus imbalance on intestinal NaP<sub>i</sub>-IIb and Calbindin mRNA expression and tibia parameters of broilers. *Asian-Australasian Journal of Animal Science*. 2012; 25:552–558.
16. Pokharel BB, Regassa A, Nyachoti CM, Kim WK. Effect of low levels of dietary available phosphorus on phosphorus utilization, bone mineralization, phosphorus transporter mRNA expression and performance in growing pigs. *Journal of Environmental Science and Health. Part. B, Pesticides, Food Contaminants, & Agricultural Wastes*. 2017; 52:395–401.
17. Eeckhout W, de Paepe M, Warnants N, Bekaert H. An estimation of the minimal P requirements for growing-finishing pigs, as influenced by the Ca level of the diet. *Animal Feed Science & Technology*. 1995; 52:29–40.
18. Wilkinson SJ, Bradbury EJ, Thomson PC, Bedford MR, Cowieson AJ. Nutritional geometry of calcium and phosphorus nutrition in broiler chicks. The effect of different dietary calcium and phosphorus concentrations and ratios on nutrient digestibility. *Animal*. 2014; 8:1080–1088.
19. Pereira Dde C, Lima RP, de Lima RT, Gonçalves Mda C, de Moraes LC, Franceschini Sdo C, Filizola RG, de Moraes RM, Ascitti LS, Costa MJ. Association between obesity and calcium:phosphorus ratio in the habitual diets of adults in a city of Northeastern Brazil: an epidemiological study. *Nutrition Journal*. 2013; 12:90.
20. Yan Q, Tang S, Bamikole MA, Han X, Zhou C, Wang M, Sun Z, Tan Z. Influences of dietary phosphorus variation on nutrient digestion, fecal endogenous phosphorus output and plasma parameters of goats. *Livestock Science*. 2011; 142:63–69.
21. Wray-Cahen D, Nguyen HV, Burrin DG, Beckett RP, Fiorotto ML, Reeds PJ, Wester TJ, Davis TA. Response of skeletal muscle protein synthesis to insulin in suckling pigs decreases with development. *American journal of physiology*. 1998; 275:E602–609.
22. Zhang Q, Pan Y, Wang R, Kang L, Xue Q, Wang X, Kong L. Quercetin inhibits AMPK/TXNIP activation and reduces inflammatory lesions to improve insulin signaling defect in the hypothalamus of high fructose-fed rats. *Journal of Nutritional Biochemistry*. 2014; 25:420–428.
23. Elliott SS, Keim NL, Stern JS, Teff K, Havel PJ. Fructose, weight gain, and the insulin resistance syndrome. *American Journal of Clinical Nutrition*. 2002; 76:911–922.

24. Tappy L, Lê KA, Tran C, Paquot N. Fructose and metabolic diseases: New findings, new questions. *Nutrition*. 2010; 26:1044–9.
25. Wang B, Yin Y. Regulation of the type IIb sodium-dependent phosphate cotransporter expression in the intestine. *Frontiers of Agriculture in China*. 2009; 3:226–230.
26. Yoshida T, Yoshida N, Monkawa T, Hayashi M, Saruta T. Dietary phosphorus deprivation induces 25-hydroxyvitamin D(3) 1 $\alpha$ -hydroxylase gene expression. *Endocrinology*. 2001; 142:1720–1726.
27. Brenza HL, Kimmel-Jehan C, Jehan F, Shinki T, Wakino S, Anazawa H, Suda T, DeLuca HF. Parathyroid hormone activation of the 25-hydroxyvitamin D3–1 $\alpha$ -hydroxylase gene promoter. *Proceedings of the National Academy of Sciences of the United States of America*. 1998; 95:1387–1391.
28. Michigami T. Regulatory mechanism of circulating inorganic phosphate. *Clinical Calcium*. 2016; 26:193–198.
29. Antonucci DM, Yamashita T, Portale AA. Dietary phosphorus regulates serum fibroblast growth factor-23 concentration in healthy men. *The Journal of Clinical Endocrinology & Metabolism*. 2006; 91:3144–3149.
30. Goldsweig BK, Carpenter TO. Hypophosphatemic rickets: lessons from disrupted fgf23 control of phosphorus homeostasis. *Current Osteoporosis Reports*. 2015; 13:88–97.
31. Miyamoto KI, Ito M, Kuwahata M, Kato S, Segawa H. Inhibition of intestinal sodium-dependent inorganic phosphate transport by fibroblast growth factor 23. *Therapeutic Apheresis & Dialysis*. 2005; 9:331–335.
32. Bergwitz C, Juppner H. Regulation of phosphate homeostasis by PTH, vitamin D, and FGF23. *Annual Reviews of Medicine*. 2010; 61:91–104.
33. Bar A, Shinder D, Yosefi S, Vax E, Playnik I. Metabolism and requirements for calcium and phosphorus in the fast-growing chicken as affected by age. *British Journal of Nutrition*. 2003; 89:51–60.
34. Shojaei Zarghani S, Soraya H, Alizadeh M. Calcium and vitamin D3 combinations improve fatty liver disease through AMPK-independent mechanisms. *European Journal of Nutrition*. 2016; 1–10.
35. Meijer AJ. Amino acids as regulators and components of nonproteinogenic pathways. *Journal of Nutrition*. 2003; 133:2057–2062.
36. Shojaiefard M, Lang F. Stimulation of the intestinal phosphate transporter SLC34A2 by the protein kinase mTOR. *Biochemical and Biophysical Research Communications*. 2006; 345:1611–1614.
37. Obeid OA. Low phosphorus status might contribute to the onset of obesity. *Obesity Reviews*. 2013; 14:659–664.
38. Chun S, Bamba T, Suyama T, Ishijima T, Fukusaki E, Abe K, Nakai Y. A High Phosphorus Diet Affects Lipid Metabolism in Rat Liver: A DNA Microarray Analysis. *PLoS One*. 2016; 11:e0155386.
39. Lia X, Wanga J, Wanga C, Zhanga C, Lia X, Tangb C, Weia X. Effect of dietary phosphorus levels on meat quality and lipid metabolism in broiler chickens. *Food Chemistry*. 2016; 205:289–296.
40. Liu L, Song Z, Sheikahmadi A, Jiao H, Lin H. Effect of Corticosterone on gene expression of feed intake regulatory peptides in laying hens. *Comparative Biochemistry and Physiology B-Biochemistry and Molecular Biology*. 2012; 162:81–87.
41. Pi DA, Liu Y, Shi HF, Li S, Odle J, Lin X, Zhu HL, Chen F, Hou YQ, Leng WB. Dietary supplementation of aspartate enhances intestinal integrity and energy status in weanling piglets after lipopolysaccharide challenge. *Journal of Nutritional Biochemistry*. 2014; 4:456–462.
42. Hou YQ, Yao K, Wang L, Ding BY, Fu DB, Liu YL, Zhu HL, Liu J, Li YT, Kang P, Yin YL, Wu GY. Effects of  $\alpha$ -ketoglutarate on energy status in the intestinal mucosa of weaned piglets chronically challenged with lipopolysaccharide. *British Journal of Nutrition*. 2011; 106:357–363.
43. Li JH, Yuan JM, Miao ZQ, Guo YM. Effects of age on intestinal phosphate transport and biochemical values of broiler chickens. *Asian-Australasian Journal of Animal Science*. 2017; 30:221–228.
